# Supplementary material
Source: Springer Nature journal article supplement (https://www.springermedizin.de/resource/supplementary/12884_2009_271_MOESM2_ESM.pdf/9457480)

- (a)
- Control m others
  - GDM m others
  - Control babies
  - Mac babies

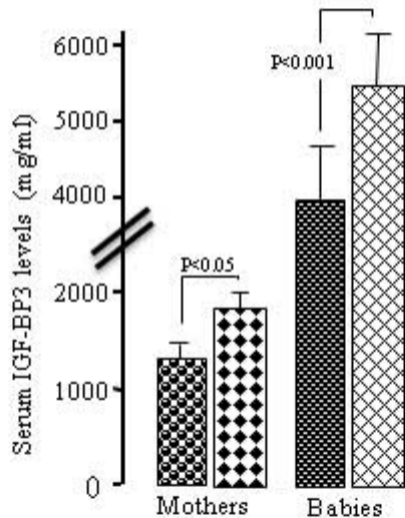

(b)

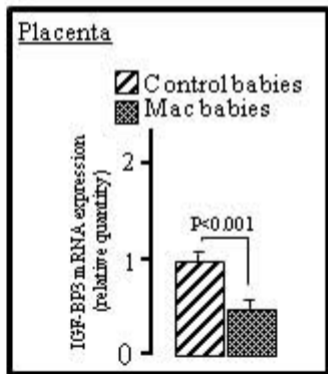

Supplement: MOESM2 [file 9457480]
